# Supplementary material for: Screening of two-photon activated photodynamic therapy sensitizers using a 3D osteosarcoma model
Source: Royal Society of Chemistry journal article supplement (doi:10.1039/c9an00068b), 2019-01-01
Supplement: c9an00068b1.pdf [file c9an00068b1.pdf]

## Supplementary Information

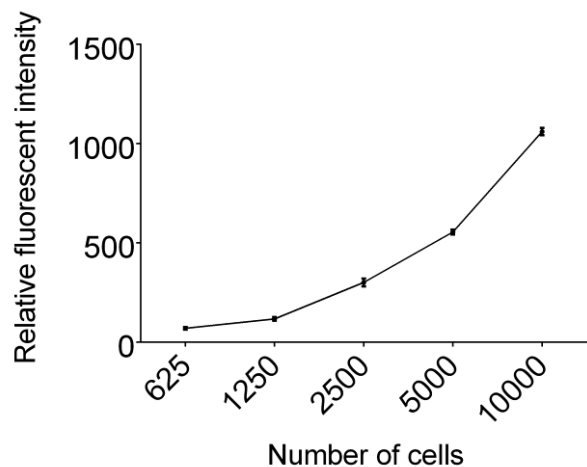

Figure S1. Calibration of cell numbers for the Presto Blue assay using the 384-well glass bottom plate.

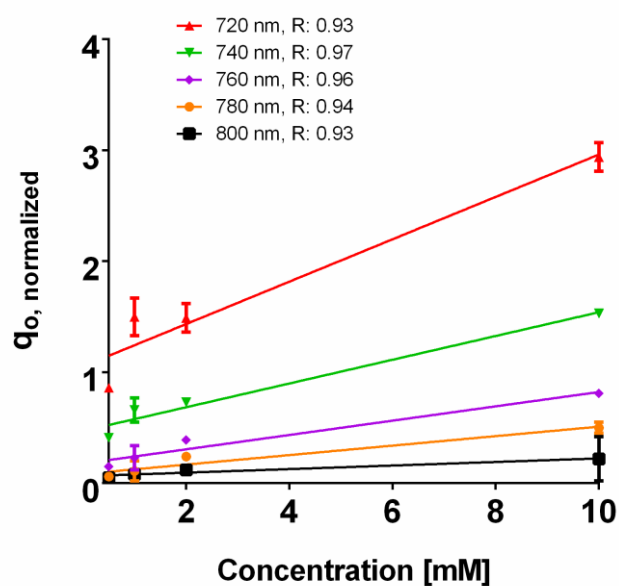

Figure S2. Concentration dependence of  $q_0$  value to the concentration of TPP.

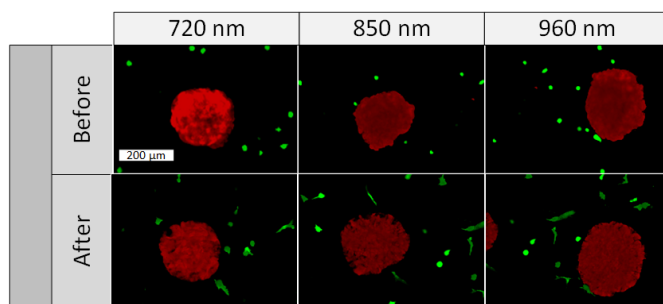

**Figure S3.** Cell viability before and after irradiation with different wavelengths (720 nm, 850 nm and 960 nm). None of the applied wavelengths caused cell
